# Supplementary material for: Care Workers and Managers’ Experiences of Implementing Infection Control Guidance in an Epidemic Context: A Qualitative Study in the South East of England, during the COVID-19 Prevaccination Era
Source: Hindawi journal article supplement (doi:10.1155/2023/4127871), 2023-04-03
Supplement: f1 [file 4127871.f1.zip]

Archive with 2 entries (2 files):
- COREQ_checklist.pdf
- IndividualInterviewTopicGuide_Appendix 1.docx
