# Supplementary material for: Care Workers and Managers’ Experiences of Implementing Infection Control Guidance in an Epidemic Context: A Qualitative Study in the South East of England, during the COVID-19 Prevaccination Era
Source: Hindawi journal article supplement (doi:10.1155/2023/4127871), 2023-04-03
Supplement: f1 [file 4127871.f1.zip › IndividualInterviewTopicGuide_Appendix 1.docx]

**Individual Interview Topic Guide**

**Part A. Residential Care Staff**

**Residential Care Managers**

**Introduction**

Thank you for taking part in this interview. The focus of this interview will be on your experience of supporting staff and new or returning residents during COVID-19. It will not be shared with anyone outside the research team unless you disclose information which may indicate new risk to yourself or others. You have already verbally consented to the interview. Do you have any questions before we begin?

**Background Information**

- **Ask work related demographics**

*Prompts: Job title; years in current position; previous work in community care setting – if yes, what was the role? Discuss previous training; any recent training*

**Opening Questions**

Broad questions regarding:

- 1. What types of care work do you provide?
  2. How many residents do you have?
  3. What types of residents?
  4. Are there interactions with residents, families and staff in closed spaces?
  5. How many staff work in your care home?
     - In a given week?
  6. Do staff work for other care homes as well? If yes, how many staff? How many care homes?
  7. Do you have staff who also work as domiciliary care workers? If yes, how many?
  8. How many of your clients have been diagnosed with COVID-19 or were suspected cases?
     - 1. What was the guidance for treatment of confirmed/suspected cases?
       2. Were there any changes to the number of carers assigned to the

**Key Areas**

**Understanding guidance on residential care during COVID-19 context for new/returning residents.**

Q1. Can you tell me about your understanding of what care homes should be doing to keep residents and staff safe during COVID? (New/returning clients)

*Prompts: discussed by manager and colleagues; literature; news*

**Experience of implementing guidance on supporting care workers and new/returning residents during COVID-19 context**

Q2. What’s your experience of applying Covid guidance?

*Prompts: Barriers and enablers; practicalities; following guidance; safety; confidence; supported*

**Changes in the provision of care for new and returning residents during COVID-19**

Q3. How has support work changed for the integration of new/returning residents during Covid?

*Prompts: Differences in what carers can/cannot do; Ways of working; Other residents; Families*

**Experience of staff working together during a COVID-19 context**

Q4. What’s your experience of staff working in close proximity with regards to COVID?

*Prompts: Clients who require more than one carer; Sharing equipment; individual PPE Taking breaks*

**Staff working in different care homes/agencies**

Q5. What’s your policy on staff working in other residential homes or domiciliary care during the pandemic?

*Prompts: permit this; hours offered to staff; staff accommodation; ensure infection control*

**Concerns and main issues regarding the provision of care for new and returning residents in the context of COVID-19**

Q6. What are your feelings about new and returning residents during COVID?

*Prompts: Returning from hospital; Family; Previous contact with COVID; safety; performing duties; have clients been in care before?*

**How have residents/families expressed concerns regarding COVID-19?**

Q7. Have residents or families expressed concerns regarding care aboutCOVID

*Prompts: Types of concerns; Feelings; Disclosure. How have concerns been dealt with?*

**Managing visitors during COVID-19?**

Q8. How do you manage visitors during COVID?

*Prompts: policy; numbers; environment for visit; masks; information?*

**Experience of having the opportunity to express own concerns of general care situation during COVID-19.**

Q9. What’s your experience of

discussing your own issues regarding the care situation during COVID?

Prompts: Who discussed with; listened to; support received; actions taken; extra support needed; extra support provided

**Personal Questions**

Q10. who else lives in your household?

*Prompts: Anyone they are concerned about, does anyone sleep elsewhere (e.g.*

*children of separated families, children in school, is anyone shielding – how is this managed?*

Q11. What have you been asked by your workplace to do

differently in your personal life due to COVID?

Q12. What would a COVID positive swab result mean for you?

*Prompts: have you had a swab test? Why? What triggered you to have it? Where did*

*you have it done? Regular testing? Easy to get tested?*

Q13. Have you heard about antibody (serological) tests?

*Prompts: Understanding of them? What might it mean for them and*

*their family?*

Q14. Are there aspects of your background that you think have had an impact on your experience of COVID?

**Hopes and views about the research**

Q15. What would you like to happen from this research?

*Prompts: Views on the research, what might support them*

**Closing statement:**

**We have now come to the end of the interview. Is there anything you would like to add that we have not spoken about that you prefer not to be part of the formal interview? Is there anything that you would like to discuss further? Thank you for your time.**

**Debrief**

- 1. Thank participant
  2. Are there any questions they’d like to ask?

**Residential Care Workers**

**Introduction**

Thank you for taking part in this interview. The focus of this interview will be on your experience of supporting new or returning residents during COVID-19. It will not be shared with anyone outside the research team unless you disclose information which may indicate new risk to yourself or others. You have already verbally consented to the interview. Do you have any questions before we begin?

**Background Information**

- **Ask work related demographics**

*Prompts: Job title; years in current position; previous work in community care setting – if yes, what was the role? Discuss previous training; any recent training*

**Opening Questions**

Broad questions regarding:

- 1. What types of care work do you do?
  2. What do you do in a typical day?
  3. How many residents do you work with in a given week?
  4. What types of residents?
  5. Do you have interactions with residents, families and staff in closed spaces?
  6. Do you work for other care homes? If yes, how many?
  7. Do you also work in domiciliary care work? If yes, how often?
  8. How do you get to work (self-driven car, care-share, public transport, walk other)?
  9. How many staff work in your care home?
  10. How many of your clients have been diagnosed with COVID-19 or were suspected cases?
      - 1. What was the guidance for treatment of confirmed/suspected cases?
        2. Were there any changes to the number of carers assigned to the confirmed/suspected cases?
  11. How often are you tested for Covid-19?
      - 1. Are tests done at random, only when displaying symptoms, or if in contact with confirmed/suspected cases?

**Key Areas**

**Understanding guidance on residential care during COVID-19 context for new/returning residents.**

Q1. what should care homes be doing to keep residents safe during COVID? (New/returning clients)

*Prompts: Training; Managers Local Authority, Guidance; literature; news*

**Differences between care homes guidance**

Q2. If you work for other care homes, how does their guidance regarding working during the pandemic differ?

*Prompts: Training; Using PPE; Differences in ways of working; Support.*

Also:

1. Asked to work for one care home?
2. Change in hours?
3. Accommodation offered by care home?

**Experience of implementing guidance on supporting care workers and new/returning residents during COVID-19 context**

Q3. What’s your experience of applying COVID guidance for yourself and new or returning residents?

*Prompts: Barriers and enablers; practicalities; following guidance; safety; confidence; supported*

**Changes in the provision of care for new and returning residents during COVID-19**

Q4. How has support work changed regarding new/returning residents during COVID?

*Prompts: Differences in what carers can/cannot do; Ways of working; Other residents; Families*

**Experience of working with colleagues during a COVID-19 context**

Q5. what is it like working in close proximity

with a colleague since COVID?

*Prompts: Clients who require more than one carer; Management support; Sharing equipment; individual PPE Taking breaks*

**Concerns and main issues regarding the provision of care for new and returning residents in the context of COVID-19**

Q6. How do you feelabout new and returning residents since COVID?

*Prompts: Returning from hospital; Family; Previous contact with COVID; safety; performing duties; have clients been in care before?*

**How have residents/families expressed concerns regarding COVID-19?**

Q7. Have residents or families expressed concerns regarding care about COVID ?*Prompts: Types of concerns; Feelings; Disclosure. How have concerns been dealt with?*

**Managing visitors during COVID-19?**

Q8. How do you manage visitors during COVID?

*Prompts: policy; numbers; environment for visit; masks; information?*

**Experience of having the opportunity to express own concerns of general care situation during COVID-19.**

Q9. Have you had the opportunity to discuss your own issues about the l care situation during COVID?

Prompts: Who discussed with; listened to; support received; actions taken; extra support needed; extra support provided

**Personal Questions**

Q10. Who else lives in your household?

*Prompts: Anyone they are concerned about, does anyone sleep elsewhere (e.g.*

*children of separated families, children in school, is anyone shielding – how is this managed?*

Q11. What you have been asked by your workplace to do

differently in your personal life due to COVID?

Q12. What would a COVID positive swab result mean for you?

*Prompts: have you had a swab test? Why? What triggered you to have it? Where did*

*you have it done? Regular testing? Easy to get tested?*

Q13. Have you heard about antibody (serological) tests?

*Prompts: Understanding of them? What might it mean for them and*

*their family?*

Q14. Are there aspects of your background that you think have had an impact on your experience of COVID?

**Hopes and views about the research**

Q15. What would you like to happen from this research?

*Prompts: Views on the research, what might support them*

**Closing statement:**

**We have now come to the end of the interview. Is there anything you would like to add that we have not spoken about that you prefer not to be part of the formal interview? Is there anything that you would like to discuss further? Thank you for your time.**

**Debrief**

1. Thank participant
2. Are there any questions they’d like to ask?

**Part B. Domiciliary Care Staff**

**Domiciliary Care Managers**

**Introduction**

Thank you for taking part in this interview. The focus of this interview will be on your experience of supporting staff and clients during COVID-19. It will not be shared with anyone outside the research team unless you disclose information which may indicate new risk to yourself or others. You have already verbally consented to the interview. Do you have any questions before we begin?

**Information**

- **Work related demographics**

*Prompts: Job title; years in current position; previous work in community care setting – if yes, what was the role? Discuss previous training; any recent training*.

- **Opening Questions**

Broad questions regarding:

Care Managers

1. How many carers work for your agency in a given week?
2. Is there any interaction between carers in a closed space?
3. Do any of your carers work for more than one agency?
   1. If yes, how many carers would you say work for other agencies?
   2. Typically, how many agencies would a carer work for?
4. What types of clients does your agency work with?
   1. Age, illness, living alone/family
5. How many clients does your agency work with?
6. What types of clients?
   1. What types of care work is provided?
7. How many of your clients have been diagnosed with the Covid-19 or were suspected cases?
   1. What was the guidance for treatment of confirmed/suspected cases?
   2. Were there any changes to the number of carers assigned to the confirmed/suspected cases?

**Key Areas**

**Understanding guidance on supporting care workers and clients during COVID-19 context**

Q1. What COVID guidance Have you been given about domiciliary care work?

*Prompts: New and returning clients; Type of guidance; Type of training; Delivery of training.*

**Differences between care providers**

Q2. What’s your policy on staff working for other agencies or in residential homes during the pandemic?

*Prompts:permit this; hours offered to staff; infection control*

**Experience of implementing guidance on supporting care workers and clients during COVID-19 context.**

Q3. What’s your experiences of applying COVID guidance?

*Prompts: Barriers and enablers; practicalities; following guidance; safety; confidence; supported.*

**Changes in the provision of domiciliary care during COVID-19**

Q4. How has domiciliary care changed since COVID?

*Prompts: New and returning clients; Differences in what carers can/cannot do; Ways of working; Concerns*

**Experience of the practicalities of working in a COVID-19 context**

Q5. What are the practicalities of staff working during COVID?

*Prompts: Carers getting to appointments; Car shares; Cleaning cars; Access to clients homes; PPE*

**Experience with working in a household during a COVID-19 context**

Q6. What support do staff receive for working in different types of households?

*Prompts: e.g. large households, households with young children/teenagers; protecting from other household members; self- protection, protection for others*

**Changes in referrals since COVID-19**

Q7. How have referrals (new clients) changed since the start of COVID (1st February, 2020)?

*Prompts: changes in carework; needs of client; impact (carer/agency); morale; client/family concerns.*

**Experience of working with colleagues during a COVID-19 context**

Q8. How are staff supported to work in close proximity with colleagues during COVID?

*Prompts: Clients who require more than one carer; Sharing equipment; Number times day/week; Type of work; different or same colleagues together*

**Concerns and main issues regarding the provision of care for clients during COVID-19**

Q9. What are your concerns for staff and clients around working or receiving care during COVID?

*Prompts: Safety; Performing care duties.*

**How have clients/families expressed concerns regarding COVID-19?**

Q10. Have clients or their families expressed concerns about care during COVID If yes, what are these concerns?

*Prompts: telephoned or face-to-face; Safety? Usual care.*

**Experience of having the opportunity to express own concerns of general care situation during COVID-19.**

Q11. Have you had the opportunity to discuss your issues about the care situation during COVID?

Prompts: Who discussed with; listened to; support received; actions taken; extra support needed; extra support provided.

**Managing Notification of Death to CQC: Care Providers ONLY (not individual carers)**

Q12. How do you notify the CQC about the death of clients since the start ofCOVID? When would and wouldn’t you notify them?

*Prompts: Changes since Covid; thoughts on it now; concerns; staffs’ response; time period to informing CQC.*

**Personal Questions**

Q13. Who else lives in your household?

*Prompts: Anyone they are concerned about, does anyone sleep elsewhere (e.g.*

*children of separated families, children in school, is anyone shielding – how is this managed?*

Q14. What have you been asked by your workplace to do

differently in your personal life due to COVID?

*Prompts: Feelings about this? Self-isolating from the family (own decision?)?*

Q15. What would a COVID positive swab result mean for you?

*Prompts: have you had a swab test? Why? What triggered you to have it? Where did*

*you have it done?*

Q16. Have you heard about antibody (serological) tests?

*Prompts: What do they understand about them? What might it mean for them and*

*their family?*

Q17.Are there aspects of your background that you think have had an impact on your experience of COVID?

**Hopes and views about the research**

Q18. What would you like to see from this research?

*Prompts: Views on the research, what might support them*

**Closing statement:**

We have now come to the end of the interview. Is there anything you would like to add that we have not spoken about that you prefer not to be part of the formal interview? Is there anything that you would like to discuss further? Thank you for your time.

Debrief

a. Thank participant

b. Are there any questions they’d like to ask?

**Domiciliary Care Workers**

**Introduction**

Thank you for taking part in this interview. The focus of this interview will be on your experience of supporting yourself and clients during COVID-19. It will not be shared with anyone outside the research team unless you disclose information which may indicate new risk to yourself or others. You have already verbally consented to the interview. Do you have any questions before we begin?

1. What types of care work do you carry out?
2. Do you work for more than one domiciliary care provider?
   1. How many?
3. Do you have any contact with your work colleagues in a closed space?
4. How often and how many colleagues do you jointly work with?
5. How often are you tested for Covid-19?
   1. Are tests random, only when displaying symptoms, or if you have been in contact with confirmed/suspected cases?
6. What types of clients do you visit?
   1. Age, illness, living alone/family
7. In a given week, how many clients do you work with?
8. How many times do you visit, per week, each client?
9. How many visits a week do you typically make?
   1. How many per day?
   2. How many days per week do you work?
10. How do you get to your client’s location (self-driven car, care-share, public transport, walk, other)?
11. Are you being provided with personal protective equipment (PPE) for every client interaction? Have you received training on how to use it?
12. How often do you change:
    1. The clients you interact with?
    2. The number of visits per day/week?
    3. The carers you work with?

**Key Areas**

**Understanding guidance on supporting care workers and clients during COVID-19 context**

Q1 What COVID guidance have been given regarding domiciliary care?

*Prompts: New and returning clients; Type of guidance; Type of training; Delivery of training.*

**Differences between care providers**

Q2. If you work for other agencies, how does their guidance about working in a pandemic differ? How do you work with the differences?

*Prompts: Training; Using PPE; Differences in ways of working; Support.*

Also:

1. Asked to work for one agency?
2. Change in hours?

**Experience of implementing guidance on supporting care workers and clients during COVID-19 context.**

Q3. What’s your experience of applying COVID guidance for yourself and clients?

*Prompts: Barriers and enablers; practicalities; following guidance; safety; confidence; supported.*

**Changes in the provision of domiciliary care during COVID-19**

Q4. How has domiciliary care changed since?

*Prompts: New and returning clients; Differences in what carers can/cannot do; Ways of working; Concerns*

**Experience of the practicalities of working in a COVID-19 context**

Q5. What are the practicalities of working during COVID?

*Prompts: Getting to appointments; Car shares; Cleaning cars; Access to clients homes; PPE*

**Experience with working in a household during a COVID-19 context**

Q6 What is it like when you work in different types of households?

*Prompts: e.g. large households, households with young children/teenagers; protecting from other household members; self- protection, protection for others*

**Changes in referrals since COVID-19**

Q7. How have referrals (new clients) changed since the start of COVID (1st February, 2020)?

*Prompts: changes in carework; needs of client; impact (carer/agency); morale; client/family concerns.*

**Experience of working with colleagues during a COVID-19 context**

Q8. What is it like for you when you work in close proximity with a colleague since COVID?

*Prompts: Clients who require more than one carer; Sharing equipment; Feelings; Number times day/week; Type of work*

**Concerns and main issues regarding the provision of care for clients during COVID-19**

Q9. What concerns you have for yourself, your family and clients regarding COVID?

*Prompts: Safety; Performing care duties.*

**How have clients/families expressed concerns regarding COVID-19?**

Q10. Have clients or families expressed concerns regarding care about COVID *Prompts: telephoned or face-to-face; Safety? Usual care.*

**Experience of having the opportunity to express own concerns of general care situation during COVID-19.**

Q11. Have you had the opportunity to discuss your issues about the care situation during COVID

Prompts: Who discussed with; listened to; support received; actions taken; extra support needed; extra support provided.

**Managing Notification of Death to CQC: Care Providers ONLY (not individual carers)**

Q12. How do you notify the CQC about the death of a client since the start of Covid-19? When would and wouldn’t you notify them?

*Prompts: Changes since Covid-19; thoughts on it now; concerns; staffs’ response; time period to informing CQC.*

**Personal Questions**

Q13 Who else lives in your household?

*Prompts: Anyone they are concerned about, does anyone sleep elsewhere (e.g.*

*children of separated families, children in school, is anyone shielding – how is this managed?*

Q14. What have you been asked by your workplace to do

differently in your personal life due to COVID?

*Prompts: Feelings about this? Self-isolating from the family (own decision?)?*

Q15. What would a COVID positive swab result mean for you?

*Prompts: have you had a swab test? Why? What triggered you to have it? Where did*

*you have it done?*

Q16. Have you heard about antibody (serological) tests?

*Prompts: What do they understand about them? What might it mean for them and*

*their family?*

Q17.Are there aspects of your background that you think have had an impact on your experience of COVID?

**Hopes and views about the research**

Q18. What would you like to result from this research?

*Prompts: Views on the research, what might support them*

**Closing statement:**

We have now come to the end of the interview. Is there anything you would like to add that we have not spoken about that you prefer not to be part of the formal interview? Is there anything that you would like to discuss further? Thank you for your time.

**Debrief**

1. Thank participants
2. Are there any questions?
